# Supplementary material for: Hydroxychloroquine, Interleukin-6 Receptor Antagonists and Corticoid Treatments of Acute COVID-19 Infection: Psychiatric Symptoms and Mental Disorders 4 Months Later
Source: PubMed Central journal article supplement — Clin Psychopharmacol Neurosci. 2022 Nov 30;20(4):762–7. doi: 10.9758/cpn.2022.20.4.762 (PMC9606425; doi:10.9758/cpn.2022.20.4.762), 2022-11-30
Supplement: cpn-20-4-762-supple.pdf [file cpn-20-4-762-supple.pdf]

**Supplementary Table 1.** Baseline characteristics, significant psychiatric symptoms and mental disorders 4 months after discharge in patients treated by three drug treatment and matched controls

|                                                                              | HCQ<br>(n = 18) | Controls <sup>a</sup><br>(n = 72) | Anti-IL-6<br>(n = 27) | Controls <sup>b</sup><br>(n = 108) | CTC<br>(n = 7) | Controls <sup>c</sup><br>(n = 28) |
|------------------------------------------------------------------------------|-----------------|-----------------------------------|-----------------------|------------------------------------|----------------|-----------------------------------|
| Baseline characteristics                                                     |                 |                                   |                       |                                    |                |                                   |
| Age (yr)                                                                     | 57.55 ± 11.5    | 57.50 ± 13.00                     | 61.6 ± 10.5           | 60.1 ± 13.2                        | 52.7 ± 8.5     | 55.9 ± 11.3                       |
| Female                                                                       | 4 (22.2)        | 17 (23.6)                         | 9 (33.3)              | 36 (33.3)                          | 1 (14.3)       | 7 (25.0)                          |
| BMI (kg/m <sup>2</sup> )                                                     | 29.7 ± 5.4      | 28.4 ± 7.0                        | 27.56 ± 7.4           | 28.7 ± 7.7                         | 29.6 ± 6.8     | 29.2 ± 4.2                        |
| History of psychiatric disorders                                             | 1 (5.6)         | 4 (5.6)                           | 6 (22.2)              | 11 (10.2)                          | 1 (14.3)       | 3 (10.7)                          |
| High blood pressure                                                          | 7 (38.9)        | 29 (40.3)                         | 15 (55.6)             | 53 (49.1)                          | 1 (14.3)       | 11 (39.3)                         |
| Type 2 diabete                                                               | 5 (27.8)        | 24 (33.3)                         | 7 (25.9)              | 40 (37.0)                          | 2 (28.6)       | 10 (35.7)                         |
| COPD                                                                         | 0               | 2 (2.8)                           | 0                     | 4 (3.7)                            | 0              | 1 (3.6)                           |
| Asthma                                                                       | 5 (27.8)        | 9 (12.5)                          | 3 (11.1)              | 15 (13.9)                          | 0              | 4 (14.3)                          |
| Smoking                                                                      | 1 (5.6)         | 1 (5.6)                           | 5 (18.5)              | 6 (5.6)                            | 0              | 4 (14.3)                          |
| Antidepressant drugs                                                         | 1 (5.6)         | 2 (2.8)                           | 4 (14.8)              | 6 (5.6)                            | 0              | 1 (3.6)                           |
| CRP                                                                          | 113.9 ± 87.4*   | 193.6 ± 110.8                     | 170.4 ± 102.7         | 162.7 ± 116.6                      | 284.7 ± 157.4  | 237.0 ± 126.0                     |
| Maximal creatininemia                                                        | 160.1 ± 178.3   | 107.2 ± 76.9                      | 179.2 ± 219.0         | 134.3 ± 170.9                      | 124.9 ± 114.2  | 131.6 ± 112.9                     |
| Intubation                                                                   | 7 (38.9)        | 32 (44.4)                         | 12 (44.4)             | 39 (36.1)                          | 5 (71.4)       | 18 (64.3)                         |
| ICU stay                                                                     | 13 (72.2)       | 53 (73.6)                         | 20 (74.1)             | 76 (70.4)                          | 7 (100.0)      | 28 (100.0)                        |
| Significant psychiatric symptoms 4 months after the acute COVID-19 infection |                 |                                   |                       |                                    |                |                                   |
| Insomnia (ISI > 14)                                                          | 4 (22.2)        | 10 (14.5)                         | 6 (22.2)              | 18 (17.5)                          | 0              | 4 (14.3)                          |
| Anxiety (HAD > 7)                                                            | 9 (50.0)*       | 15 (21.7)                         | 10 (37.0)             | 23 (21.3)                          | 1 (14.3)       | 9 (32.1)                          |
| Depression (BDI > 7)                                                         | 4 (22.2)        | 11 (15.7)                         | 9 (33.3)*             | 15 (13.9)                          | 0              | 4 (14.3)                          |
| Mental disorders 4 months after the acute COVID-19 infection                 |                 |                                   |                       |                                    |                |                                   |
| All mental disorders                                                         | 6 (33.3)        | 12 (16.7)                         | 8 (29.6)              | 14 (13.0)                          | 1 (14.3)       | 5 (17.9)                          |
| Major depressive disorders                                                   | 5 (27.8)        | 10 (13.9)                         | 6 (22.2)              | 10 (9.3)                           | 1 (14.3)       | 2 (7.1)                           |
| Anxiety disorders                                                            | 2 (11.1)        | 9 (12.5)                          | 4 (14.8)              | 5 (4.6)                            | 0              | 2 (7.1)                           |

Values are presented as mean ± standard deviation or number (%).

HCQ, hydroxychloroquine; Anti-IL-6, interleukin-6 receptor antagonists; CTC, corticotherapy; BMI, body mass index COPD, chronic obstructive pulmonary disease; CRP, C-reactive protein; ICU, intensive care unit; ISI, Insomnia Severity Index; HAD, Hospital Anxiety and Depression; BDI, Beck Depression Inventory.

<sup>a</sup>Propensity-matched cohort on age, sex, history of psychiatric disorders and ICU stay with a 4:1 matching. <sup>b</sup>Propensity-matched cohort on age, sex, history of psychiatric disorders, ICU stay, antidepressant drugs, maximal creatininemia and Intubation with a 4:1 matching. <sup>c</sup>Propensity-matched cohort on age, sex, history of psychiatric disorders, CRP, ICU stay and intubation with a 4:1 matching.

\*Statistically significant in comparison to controls ( $p < 0.05$ ).
